# Supplementary material
Source: Springer Nature journal article supplement (https://www.springermedizin.de/resource/supplementary/12943_2014_1496_MOESM3_ESM.pdf/9553028)
Supplement: MOESM3 [file 9553028]

| Chromosome | Cytogenetic band | Number of cases |       | Rate (%) | Target Regions/Genes |             |                          |                                                   |
|------------|------------------|-----------------|-------|----------|----------------------|-------------|--------------------------|---------------------------------------------------|
|            |                  | CNA             | cnLOH |          | Size Mb              | Nb of genes | Candidate genes          | Gene Functions                                    |
| 1          | p36.32           | 18              | 0     | 81,8     | 0,51                 | 2           |                          |                                                   |
| 1          | p36.32-p36.31    | 19              | 0     | 86,4     | 1,68                 | 4           |                          |                                                   |
| 1          | p36.23-p36.22    | 19              | 0     | 86,4     | 2,83                 | 26          | APITD1                   | tumor suppressor candidate, cell death            |
| 1          | p36.11-p35.3     | 19              | 0     | 86,4     | 0,36                 | 4           | IFI6                     | regulation of apoptosis                           |
| 1          | p35.2-p35.1      | 18              | 0     | 81,8     | 2,38                 | 48          |                          |                                                   |
| 1          | p34.3            | 18              | 0     | 81,8     | 0,62                 | 11          | CDCA8                    | mitosis and cell division regulation              |
| 1          | p34.2            | 17              | 0     | 77,3     | 0,74                 | 13          |                          |                                                   |
| 1          | p34.1            | 17              | 1     | 81,8     | 0,58                 | 13          | MUTYH                    | oxidative DNA damage repair                       |
| 1          | p32.3-p32.2      | 17              | 0     | 77,3     | 2,67                 | 16          |                          |                                                   |
| 1          | p31.3            | 16              | 0     | 72,7     | 0,10                 | 2           |                          |                                                   |
| 1          | p31.3            | 16              | 0     | 72,7     | 2,47                 | 13          |                          |                                                   |
| 1          | p31.1            | 16              | 0     | 72,7     | 2,19                 | 13          |                          |                                                   |
| 1          | p31.1            | 16              | 0     | 72,7     | 1,65                 | 1           |                          |                                                   |
| 1          | p31.1-p22.2      | 16              | 0     | 72,7     | 5,39                 | 25          | BCL10<br>SH3GLB1<br>LMO4 | regulation of apoptosis<br>cell cycle regulation  |
| 1          | p22.2            | 16              | 0     | 72,7     | 0,79                 | 5           |                          |                                                   |
| 1          | p22.2-p22.21     | 16              | 0     | 72,7     | 3,67                 | 27          | FNBP1L<br>TGFB3          | actin polymerisation<br>TGFB signaling inhibition |
| 1          | p21.3            | 16              | 0     | 72,7     | 1,18                 | 2           |                          |                                                   |
| 1          | p13.2-p13.1      | 17              | 0     | 77,3     | 1,78                 | 13          | TSPAN2                   | cell development, growth and motility             |
| 1          | p12-p11.2        | 17              | 0     | 77,3     | 2,93                 | 20          |                          |                                                   |
| 2          | p15              | 6               | 1     | 31,8     | 0,57                 | 5           |                          |                                                   |
| 2          | q22.1            | 7               | 2     | 40,9     | 0,11                 | 1           |                          |                                                   |
| 3          | p24.1            | 10              | 0     | 45,5     | 0,55                 | 3           |                          |                                                   |
| 4          | p12              | 3               | 4     | 31,8     | 1,05                 | 5           |                          |                                                   |
| 4          | p12-p11          | 3               | 4     | 31,8     | 1,31                 | 12          |                          |                                                   |
| 4          | q12-q13.1        | 5               | 7     | 54,5     | 4,52                 | 16          | CEP135                   | centrosomal protein                               |
| 4          | q21.3            | 1               | 7     | 36,4     | 0,40                 | 2           |                          |                                                   |
| 4          | q32.3-q33        | 6               | 7     | 59,1     | 2,92                 | 11          |                          |                                                   |
| 4          | q35.2            | 6               | 7     | 59,1     | 3,88                 | 11          | FAT1                     | tumor suppressor                                  |
| 5          | p13.2            | 5               | 1     | 27,3     | 0,91                 | 8           | SKP2                     | cell cycle regulation                             |
| 5          | q11.2            | 5               | 1     | 27,3     | 1,05                 | 4           |                          |                                                   |
| 5          | q13.2            | 4               | 3     | 31,8     | 0,11                 | 3           | NAIP                     | regulation of apoptosis                           |
| 5          | q31.1            | 3               | 4     | 31,8     | 0,45                 | 4           |                          |                                                   |

| Chromosome | Cytogenetic band | Number of cases |       | Rate (%) | Target Regions |             |                  |                                                      |
|------------|------------------|-----------------|-------|----------|----------------|-------------|------------------|------------------------------------------------------|
|            |                  | CNA             | cnLOH |          | Size Mb        | Nb of genes | Candidate genes  | Gene Functions                                       |
| 6          | q14.1            | 6               | 1     | 31,8     | 2,25           | 5           | TTK              | cell cycle regulation                                |
| 6          | q15              | 6               | 1     | 31,8     | 2,11           | 13          |                  |                                                      |
| 6          | q21              | 8               | 1     | 40,9     | 0,58           | 3           |                  |                                                      |
| 6          | q23.3-q24.1      | 7               | 1     | 36,4     | 0,57           | 3           |                  |                                                      |
| 6          | q24.1-q24.2      | 7               | 1     | 36,4     | 2,30           | 14          |                  |                                                      |
| 7          | q11.21           | 2               | 5     | 31,8     | 0,55           | 3           |                  |                                                      |
| 8          | q11.22           | 2               | 3     | 22,7     | 0,99           | 1           |                  |                                                      |
| 8          | q22.2            | 1               | 4     | 22,7     | 0,59           | 3           | STK3             | growth suppressor                                    |
| 9          | p21.3            | 11              | 0     | 50,0     | 0,07           | 3           | CDKN2A<br>CDKN2B | cell cycle regulation                                |
| 9          | p21.3            | 10              | 0     | 45,5     | 1,27           | 1           |                  |                                                      |
| 9          | p21.3-p21.2      | 10              | 0     | 45,5     | 1,45           | 1           | TUSC1            | tumor suppressor                                     |
| 9          | p21.2-p21.1      | 10              | 0     | 45,5     | 0,87           | 3           |                  |                                                      |
| 9          | p21.1            | 10              | 0     | 45,5     | 2,90           | 1           |                  |                                                      |
| 9          | q22.31           | 10              | 2     | 54,5     | 0,28           | 1           |                  |                                                      |
| 9          | q33.2            | 10              | 1     | 50,0     | 0,32           | 5           | CEP110           | centrosomal protein                                  |
| 10         | p12.31           | 6               | 2     | 36,4     | 0,35           | 2           |                  |                                                      |
| 10         | p11.21-p11.1     | 6               | 4     | 45,5     | 0,79           | 4           |                  |                                                      |
| 10         | q11.22           | 6               | 2     | 36,4     | 0,47           | 2           |                  |                                                      |
| 10         | q21.1            | 6               | 1     | 31,8     | 0,69           | 1           |                  |                                                      |
| 11         | q13.1            | 7               | 3     | 45,5     | 0,67           | 25          | BAD              | regulation of apoptosis                              |
| 11         | q13.3            | 7               | 1     | 36,4     | 0,31           | 3           |                  |                                                      |
| 11         | q14.1            | 7               | 1     | 36,4     | 2,16           | 14          |                  |                                                      |
| 11         | q22.1            | 7               | 1     | 36,4     | 1,39           | 1           |                  |                                                      |
| 13         | q22.2-q31.1      | 8               | 1     | 40,9     | 5,50           | 11          |                  |                                                      |
| 13         | q31.1            | 8               | 1     | 40,9     | 1,17           | 1           |                  |                                                      |
| 13         | q34              | 10              | 1     | 50,0     | 2,44           | 10          | ING1             | tumor suppressor                                     |
| 13         | q34              | 8               | 2     | 45,5     | 0,51           | 5           | RASA3<br>CDC16   | cell proliferation and<br>differentiation<br>mitosis |
| 14         | q13.1            | 18              | 0     | 81,8     | 0,34           | 2           |                  |                                                      |
| 14         | q13.2            | 18              | 0     | 81,8     | 0,95           | 9           |                  |                                                      |
| 14         | q21.1-q21.3      | 18              | 0     | 81,8     | 6,10           | 8           | FANCM            | DNA repair system                                    |

| Chromosome | Cytogenetic band | Number of cases |       | Rate (%) | Target Regions |             |                    |                                            |
|------------|------------------|-----------------|-------|----------|----------------|-------------|--------------------|--------------------------------------------|
|            |                  | CNA             | cnLOH |          | Size Mb        | Nb of genes | Candidate genes    | Gene Functions                             |
| 15         | q11.1-q11.2      | 14              | 0     | 63,6     | 2,81           | 11          |                    |                                            |
| 15         | q11.2            | 14              | 0     | 63,6     | 0,11           | 1           |                    |                                            |
| 15         | q14              | 14              | 0     | 63,6     | 0,11           | 1           |                    |                                            |
| 15         | q15.2-q15.3      | 13              | 1     | 63,6     | 1,52           | 27          | CCNDBP1<br>TP53BP1 | cell cycle regulation<br>DNA repair system |
| 17         | q21.2-q21.31     | 4               | 2     | 27,3     | 0,61           | 25          |                    |                                            |
| 17         | q23.1-q23.2      | 2               | 4     | 27,3     | 0,58           | 6           | PPM1D              | cell stress response                       |
| 21         | q22.3            | 5               | 1     | 27,3     | 0,60           | 9           | PCNT               | centromere function, cell cycle regulation |
